# Supplementary material for: Sensory-Driven Enhancement of Calcium Signals in Individual Purkinje Cell Dendrites of Awake Mice
Source: PubMed Central journal article supplement — Cell Rep. Author manuscript; Available in PMC 2015 Mar 13. (PMC3996650; doi:10.1016/j.celrep.2014.02.001), 2014-02-27
Supplement: NIHMS567139-supplement-01.pdf [file NIHMS567139-supplement-01.pdf]

**Sensory-driven enhancement of calcium signals  
in individual Purkinje cell dendrites of awake mice**

Farzaneh Najafi<sup>1\*</sup>, Andrea Giovannucci<sup>2\*</sup>, Samuel S.-H. Wang<sup>2</sup>, Javier F. Medina<sup>3</sup>

<sup>1</sup>Department of Biology, University of Pennsylvania, Philadelphia, PA 19104, USA

<sup>2</sup>Department of Molecular Biology and Princeton Neuroscience Institute, Princeton University, Princeton, NJ 08544, USA

<sup>3</sup>Department of Psychology, University of Pennsylvania, Philadelphia, PA 19104, USA

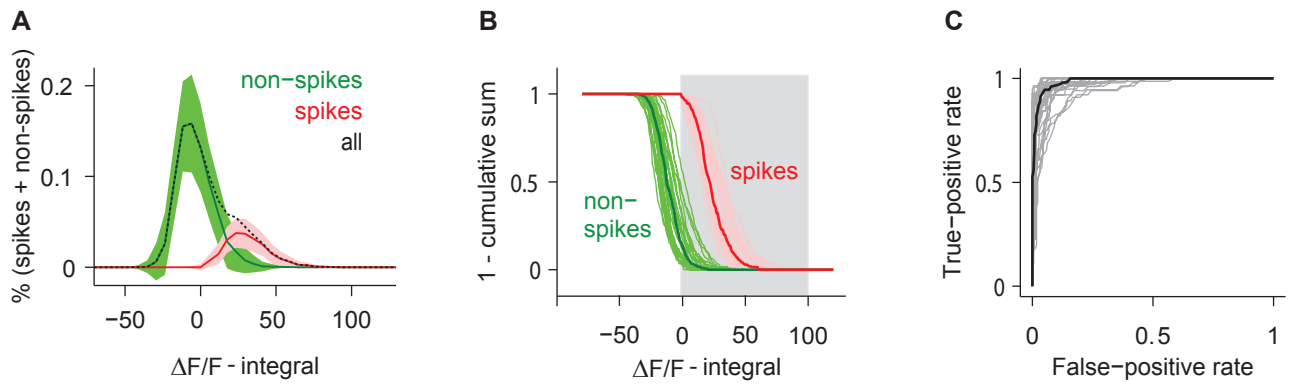

**Figure S1, related to Experimental Procedures. Calcium spikes are largely separable from non-spikes based on their  $\Delta F/F$ -integral value.**

Calcium spikes were identified by our spike-detection algorithm, which involved template matching and threshold setting (see Experimental Procedures). In this figure we compare the  $\Delta F/F$ -integral value of calcium spikes with non-spikes. Panel **A** shows the distribution of  $\Delta F/F$ -integral values for calcium spikes (red), non-spikes (green), and the pooled data (dashed). Calcium spikes and non-spikes have largely distinct  $\Delta F/F$  integrals (Figure S1A; mean $\pm$ s.d.; bin width=6  $\Delta F/F$ .ms); however, there is a slight overlap between the two distributions. This overlap results from fluorescence signals that, despite having a rather large  $\Delta F/F$  integral, were not identified as calcium spikes, because their temporal profile was different from the template used in our spike-identification algorithm. Figure S1B shows one minus the cumulative distributions of calcium spikes (red) and non-spikes (green) for all the dendrites (thick lines: median). These curves represent the rate of true positives (red) and false positives (green) in discriminating the spike, non-spike distributions based on the  $\Delta F/F$ -integral values. In order to quantify the separation of the two distributions, we performed ROC analysis by plotting true-positive rates against false-positive rates for each dendrite (Figure S1C; black: median). The highly bowed ROC curves indicate that the distribution of  $\Delta F/F$  integrals is largely separable for calcium spikes compared to non-spikes. Area under ROC curve, which represents the performance in discriminating spikes from non-spikes, equals  $0.98\pm 0.02$ , (mean $\pm$ s.d.), demonstrating a very high discrimination rate.

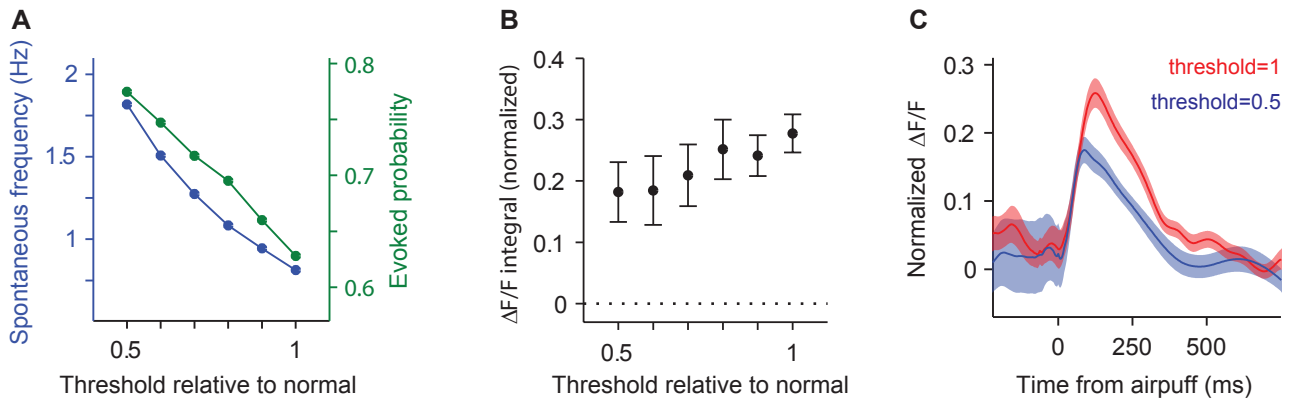

**Figure S2, related to Figure 4. Non-CF signal cannot arise from missed calcium spikes.**

Non-CF signal might represent small CF-triggered calcium spikes that we failed to identify. We addressed this possibility by changing the threshold of our spike-detection algorithm. As expected, the frequency of spontaneous calcium spikes (Figure S2A, blue) and the probability of airpuff-evoked calcium spikes (Figure S2A, green; bin width=100ms) were higher at lower thresholds (threshold=1 represents the normal threshold; dots represent averages across all dendrites; n=41). For instance when the threshold was changed to 50% of its normal value, the spontaneous frequency was approximately doubled (1.8 Hz at threshold 0.5 compared to 0.8 Hz at threshold 1). Since spontaneous calcium spikes happen at about 1 Hz, a frequency of 1.8 Hz suggests very few failures in detecting calcium spikes at threshold 0.5. Next we computed  $\Delta F/F$ -integral for the non-CF signal at each value of the threshold (Figure S2B; mean $\pm$ s.e.m;  $\Delta F/F$ -integral is normalized to the average  $\Delta F/F$ -integral of spontaneous spikes). As expected, the non-CF signal got smaller as the threshold decreased; however, we still observed a significant non-CF signal at all the thresholds (one sample t-test  $P < 0.05$ ). Figure S2C represents the average non-CF trace for threshold 1 (red) and 0.5 (blue), demonstrating that even when the rate of missed calcium spikes is very low, i.e. at threshold 0.5, a clear non-CF signal could be detected. All data in this figure came from GCaMP6f experiments. We observed similar results for OGB-1/AM data.
